# Supplementary material for: Highly active, stable oxidized platinum clusters as electrocatalysts for the hydrogen evolution reaction
Source: Royal Society of Chemistry journal article supplement (doi:10.1039/c7ee02537h), 2017-01-01
Supplement: c7ee02537h1.pdf [file c7ee02537h1.pdf]

## ***Electronic Supplementary Information for***

### **Highly Active, Stable Oxidized Platinum Clusters as Electrocatalysts for the Hydrogen Evolution Reaction**

*Xing Cheng,<sup>a</sup> Yonghe Li,<sup>b</sup> Lirong Zheng,<sup>c</sup> Yong Yan,<sup>d</sup> Yuefei Zhang,<sup>b</sup> Ge Chen,<sup>a\*</sup> Shaorui Sun,<sup>a\*</sup> Jiujun*

*Zhang<sup>e\*</sup>*

[a] Beijing Key Laboratory for Green Catalysis and Separation, College of Environmental & Energy Engineering, Beijing University of Technology, 100124 Beijing, P.R. China

E-mail: [chengx@bjut.edu.cn](mailto:chengx@bjut.edu.cn) and [sunsr@bjut.edu.cn](mailto:sunsr@bjut.edu.cn)

[b] Institute of Microstructure and Property of Advanced Materials, Beijing University of Technology, Beijing 100124, P. R. China

[c] Beijing Synchrotron Radiation Facility, Institute of High Energy Physics, Chinese Academy of Sciences, Beijing 100049, P.R. China.

[d] Department of Applied Physics and Key Laboratory of Soft Chemistry and Functional Materials (Ministry of Education), Nanjing University of Science and Technology, Nanjing, Jiangsu 210094, P. R. China

[e] College of Sciences & Institute for Sustainable Energy, Shanghai University, Shanghai 200444, P. R. China

E-mail: [jiujun@shu.edu.cn](mailto:jiujun@shu.edu.cn)

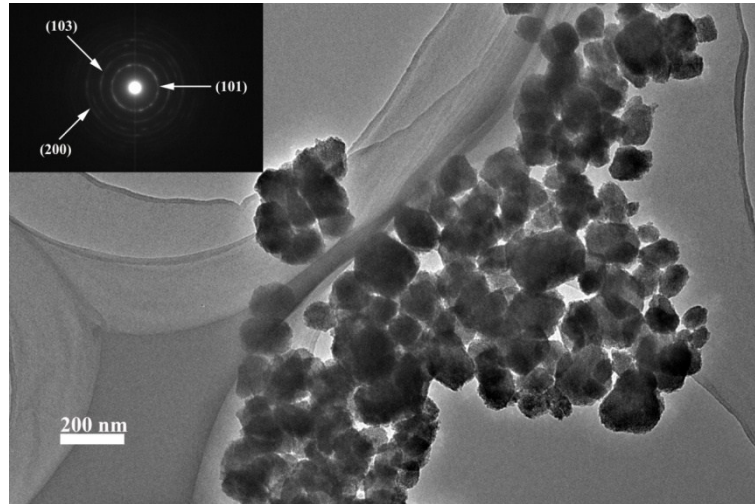

**Figure S1a.** TEM images of PtO<sub>x</sub>/TiO<sub>2</sub>. Scale bar 200 nm; insert: SAED of PtO<sub>x</sub>/TiO<sub>2</sub>.

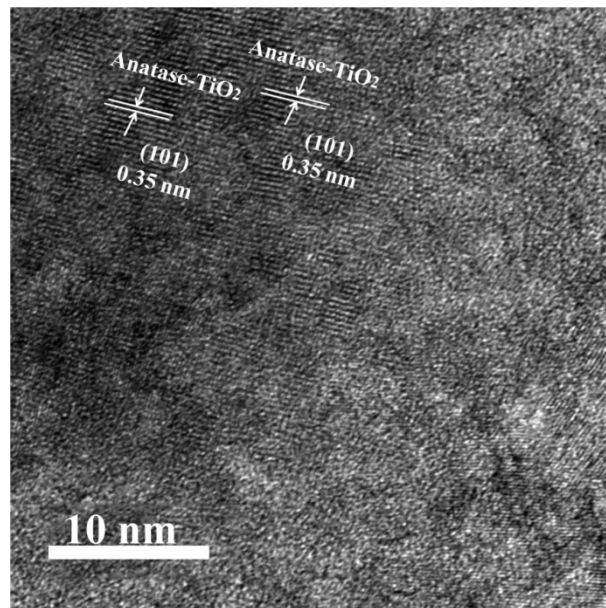

**Figure S1b.** TEM images of PtO<sub>x</sub>/TiO<sub>2</sub>. Scale bar 10 nm.

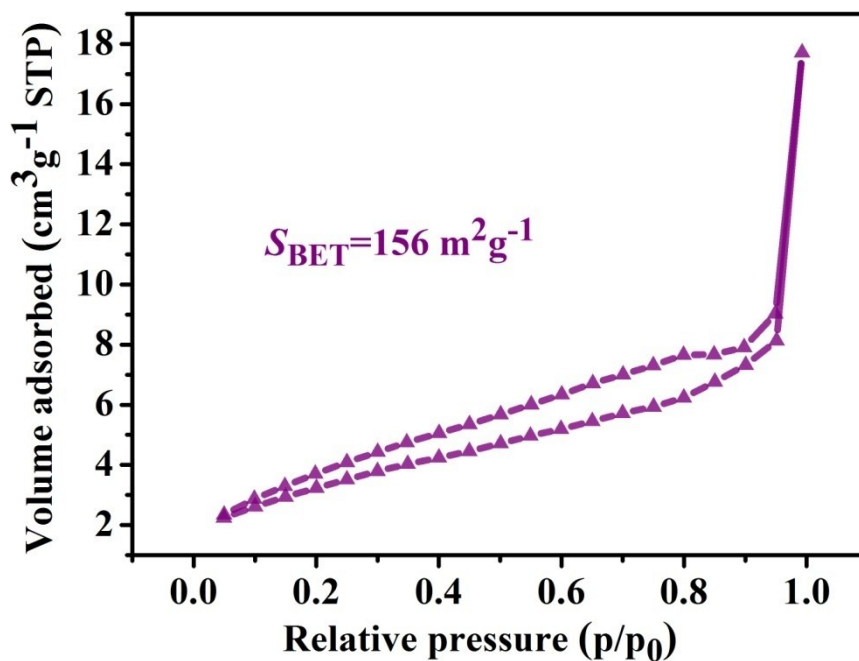

Figure S2a.  $\text{N}_2$  adsorption and desorption isotherms plots of  $\text{PtO}_x/\text{TiO}_2$ .

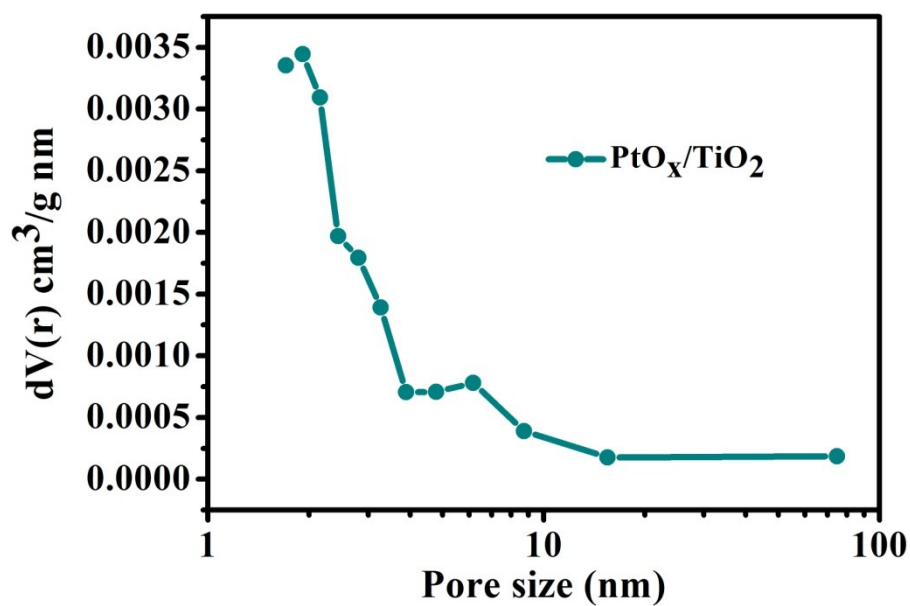

Figure S2b. BJH pore size distribution for  $\text{PtO}_x/\text{TiO}_2$ .

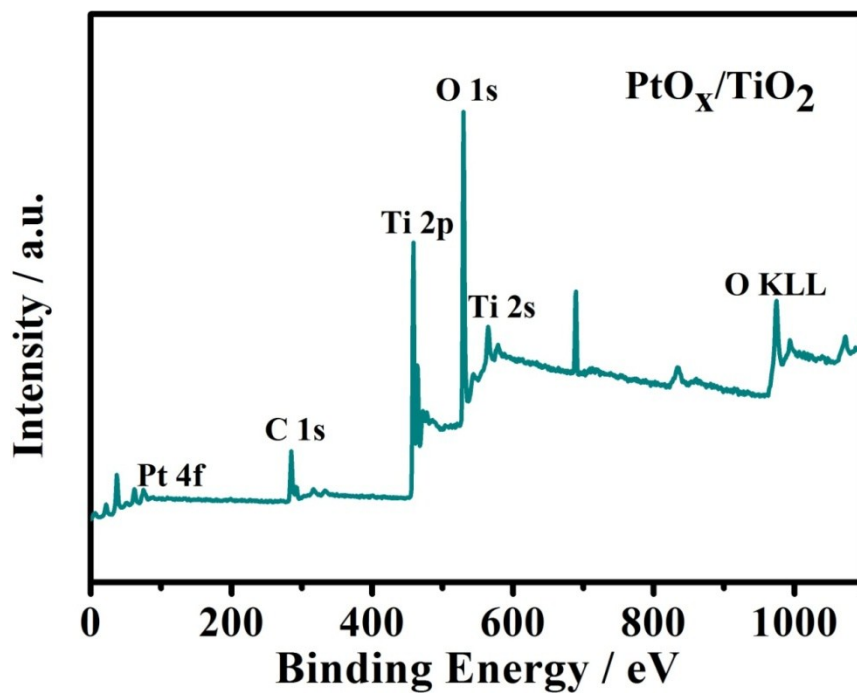

Figure S3a. XPS survey spectrum for PtO<sub>x</sub>/TiO<sub>2</sub> catalyst.

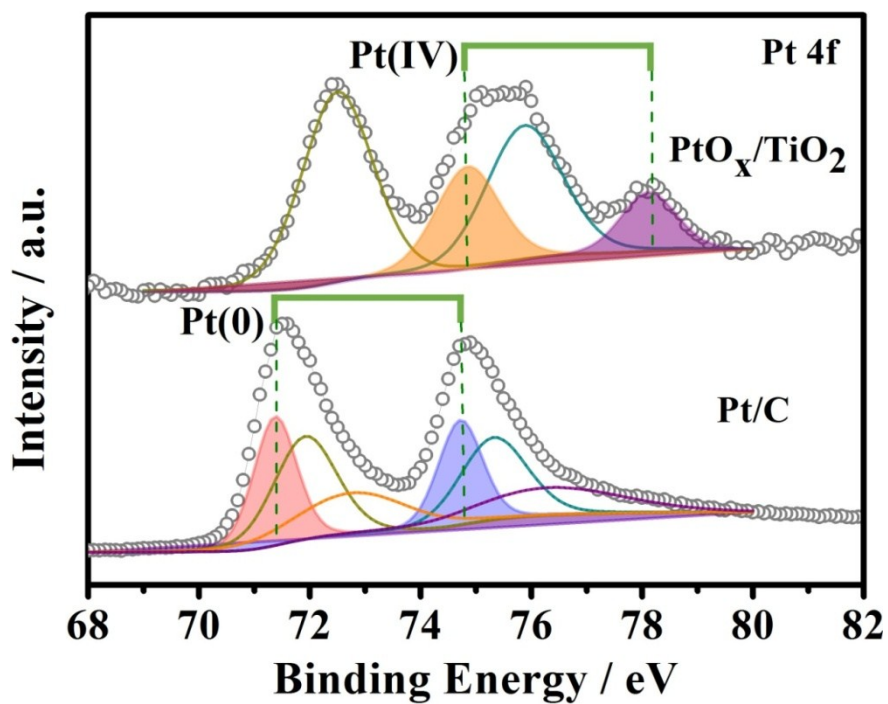

**Figure S3b.** High-resolution XPS spectra of Pt 4f in the PtO<sub>x</sub>/TiO<sub>2</sub> and the Pt/C catalysts.

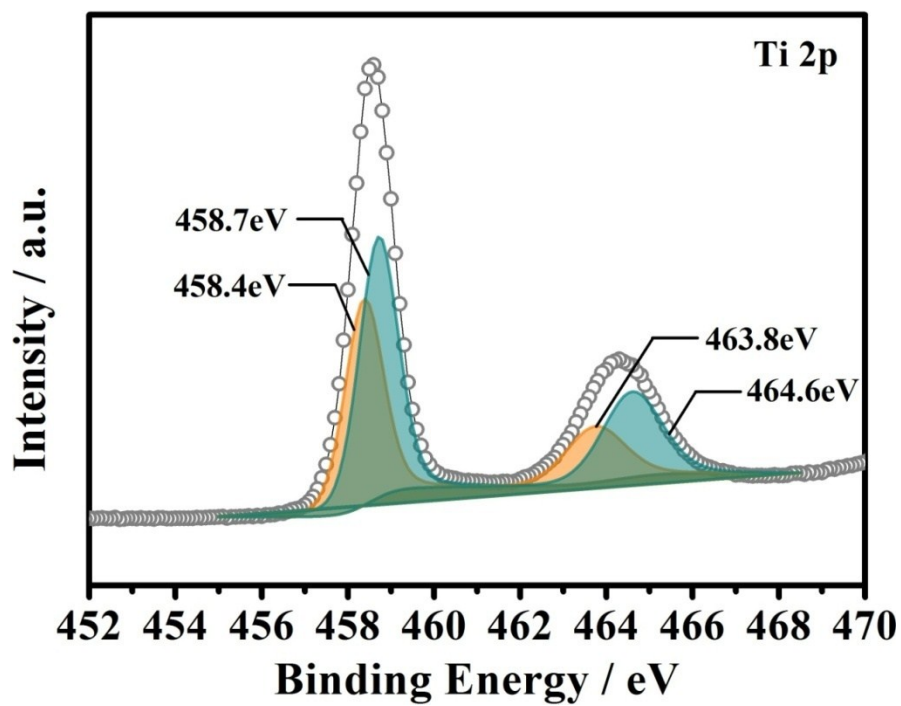

**Figure S3c.** High-resolution XPS spectrum of Ti<sub>2p</sub> in the PtO<sub>x</sub>/TiO<sub>2</sub> catalyst.

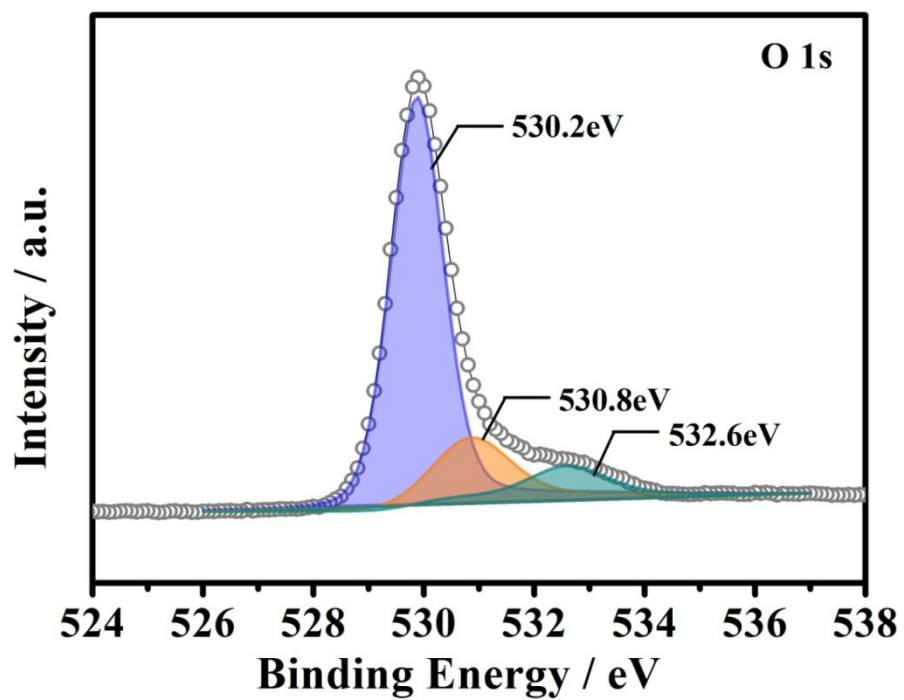

**Figure S3d.** High-resolution XPS spectrum of O 1s in the PtO<sub>x</sub>/TiO<sub>2</sub> catalyst.

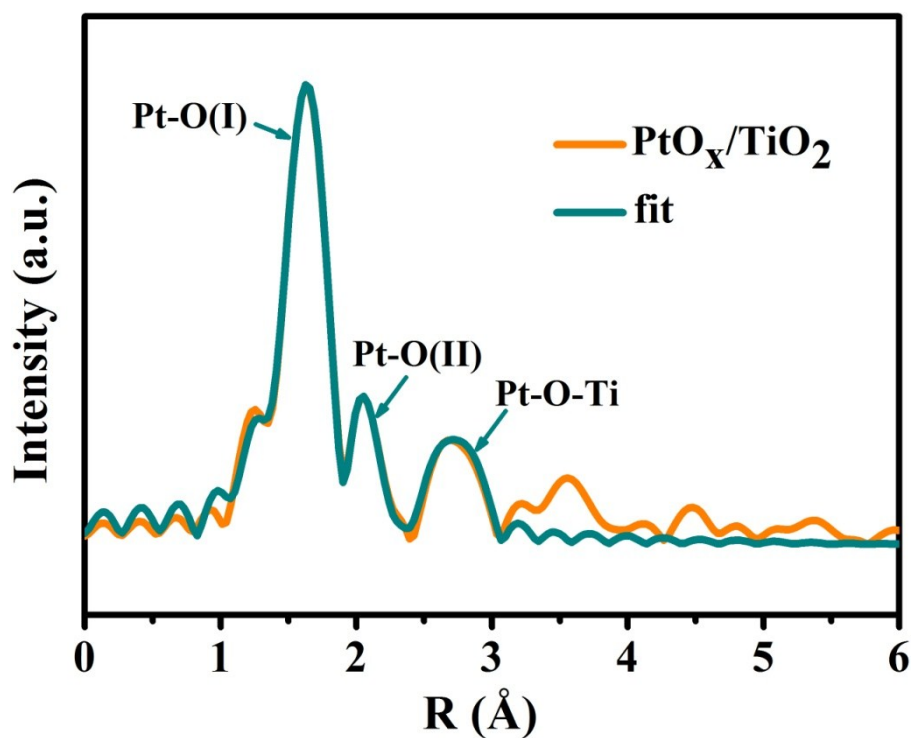

**Figure S4.**  $K^3$ -weighted Fourier transform spectra from EXAFS and fitted spectra of fresh  $\text{PtO}_x/\text{TiO}_2$ .

| EXAFS fitting parameters at the Pt $L_{III}$ -edge for the fresh $\text{PtO}_x/\text{TiO}_2$ |          |       |                 |                                     |                           |                |
|----------------------------------------------------------------------------------------------|----------|-------|-----------------|-------------------------------------|---------------------------|----------------|
| Sample                                                                                       | Shell    | $N^a$ | $R(\text{Å})^b$ | $\sigma^2(\text{Å}^2 \cdot 10^3)^c$ | $\Delta E_0(\text{eV})^d$ | $R$ factor (%) |
| $\text{PtO}_x/\text{TiO}_2$                                                                  | Pt-O(I)  | 4.3   | 1.99            | 2.2                                 | 10.9                      | 0.53           |
|                                                                                              | Pt-O(II) | 2.5   | 2.43            | 4.1                                 |                           |                |
|                                                                                              | Pt-O-Ti  | 1.8   | 3.07            | 6.0                                 |                           |                |

**Table S1.** EXAFS fitting parameters at the Pt  $L_{III}$ -edge for the fresh  $\text{PtO}_x/\text{TiO}_2$ . <sup>a</sup> $N$ : coordination number; <sup>b</sup> $R$ : bond distance; <sup>c</sup> $\sigma^2$ : Debye-Waller factor; <sup>d</sup> $\Delta E_0$ : inner potential correction.



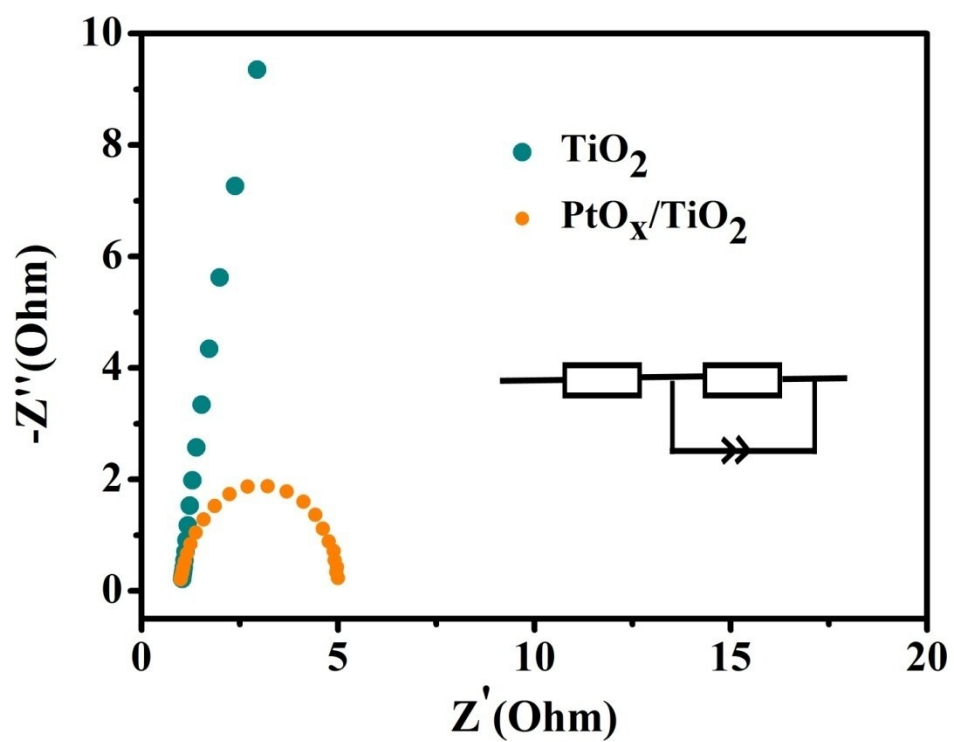

**Figure S5.** Electrochemical impedance spectroscopy (EIS) (Nyquist plots) of  $\text{PtO}_x/\text{TiO}_2$  and  $\text{TiO}_2$  in  $0.5 \text{ M H}_2\text{SO}_4$  solution.

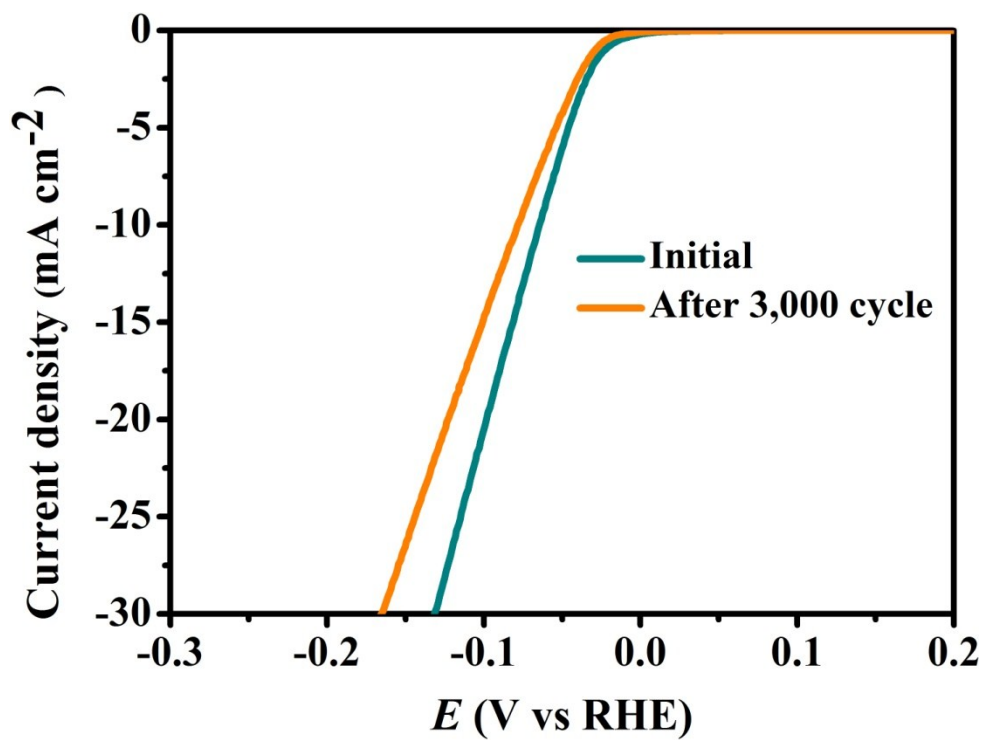

**Figure S6.** Polarizations curves of Pt/C before and after CV between -0.15~0.4 V vs. RHE at 100mVs<sup>-1</sup> for 3,000 cycles.

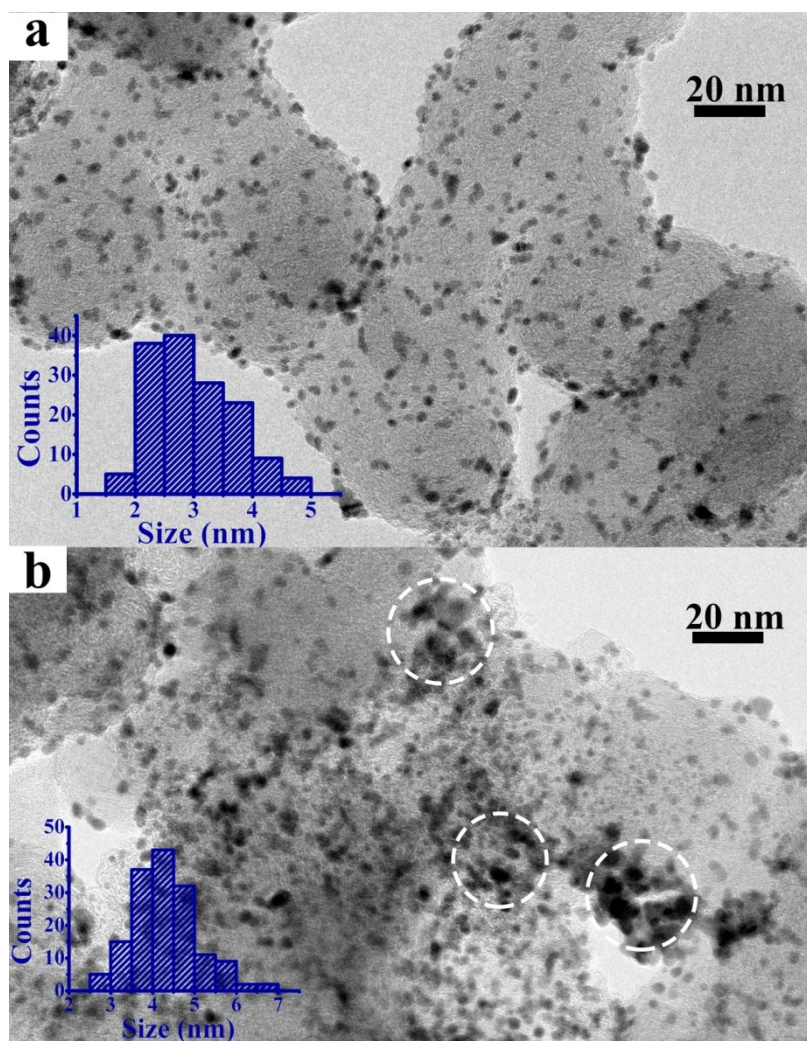

**Figure S7.** TEM images of Pt/C catalyst (a) before and (b) after ADT.

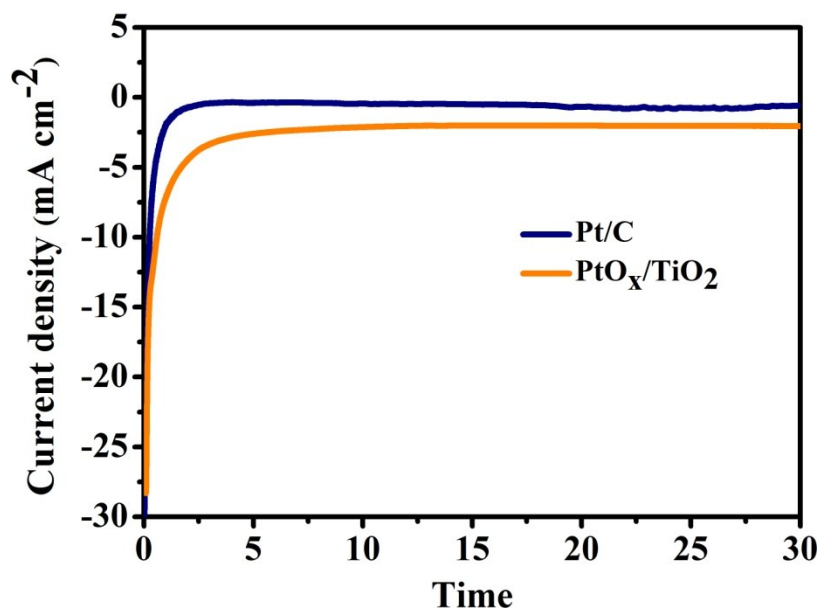

**Figure S8.** The long term stability of the PtO<sub>x</sub>/TiO<sub>2</sub> and Pt/C catalysts for the HER at -0.2V (vs.RHE) for 30 hours.

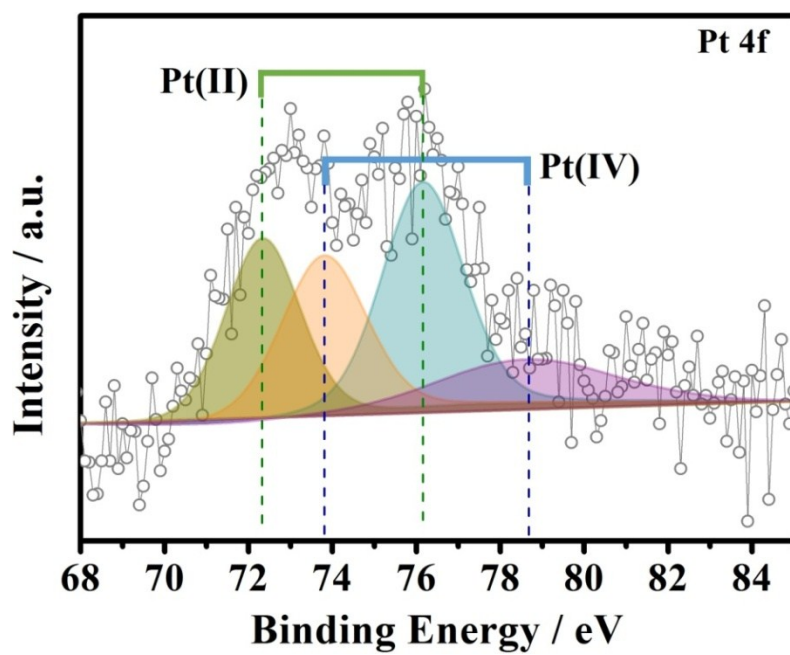

**Figure S9.** High-resolution XPS spectra of Pt 4f in the PtO<sub>x</sub>/TiO<sub>2</sub> catalyst. (after 30 hours of electrolysis).

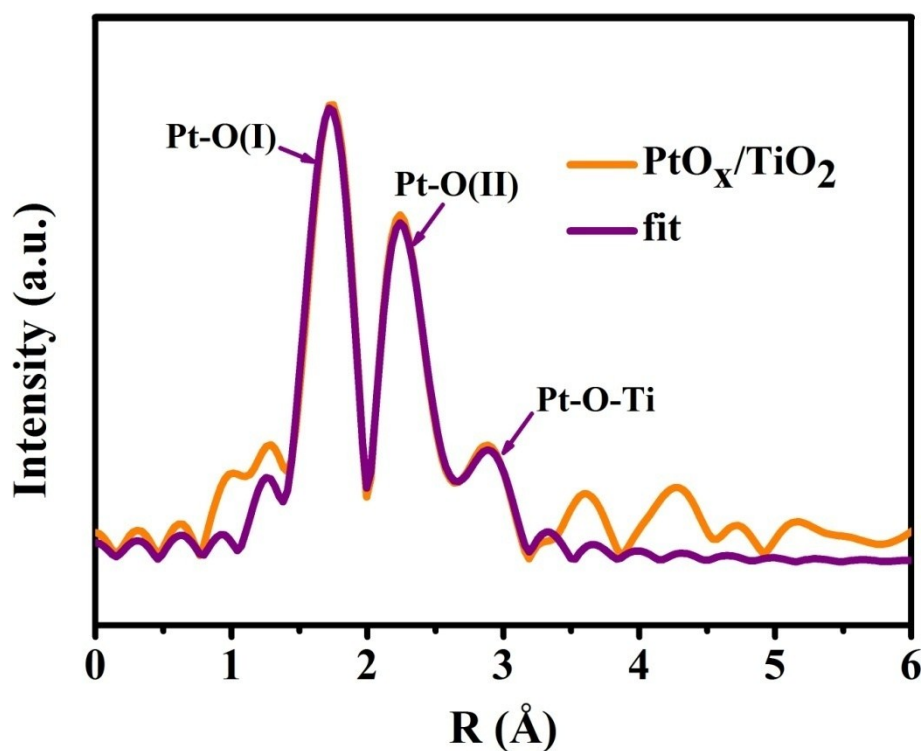

**Figure S10.**  $K^3$ -weighted Fourier transform spectra from EXAFS and fitted spectra of  $PtO_x/TiO_2$  (after 30 hours of electrolysis).

| EXAFS fitting parameters at the Pt $L_{III}$ -edge for the $PtO_x/TiO_2$ |          |       |                 |                                     |                           |                |
|--------------------------------------------------------------------------|----------|-------|-----------------|-------------------------------------|---------------------------|----------------|
| Sample                                                                   | Shell    | $N^a$ | $R(\text{Å})^b$ | $\sigma^2(\text{Å}^2 \cdot 10^3)^c$ | $\Delta E_0(\text{eV})^d$ | $R$ factor (%) |
| $PtO_x/TiO_2$                                                            | Pt-O(I)  | 1.2   | 2.04            | 1.5                                 | 13.8                      | 0.64           |
|                                                                          | Pt-O(II) | 1.6   | 2.61            | 2.0                                 |                           |                |
|                                                                          | Pt-O-Ti  | 0.6   | 3.28            | 5.2                                 |                           |                |

**Table S2.** EXAFS fitting parameters at the Pt  $L_{III}$ -edge for the  $PtO_x/TiO_2$  after 30 hours of stability measurements. <sup>a</sup> $N$ : coordination number; <sup>b</sup> $R$ : bond distance; <sup>c</sup> $\sigma^2$ : Debye-Waller factor; <sup>d</sup> $\Delta E_0$ : inner potential correction.

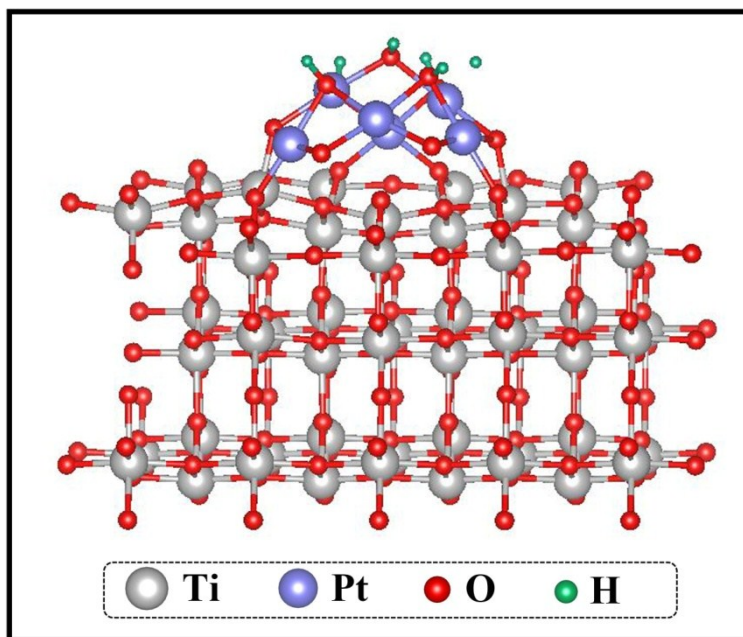

**Figure S11.** Geometry structure of H\* adsorbed on Pt<sup>4+</sup> site after O<sup>2-</sup> sites occupied by H\*.

| <b>Bader charges of TiO<sub>2</sub>(anatase)-(101) surface and PtO<sub>x</sub> cluster</b> |  |                                          |                          |                                          |                          |
|--------------------------------------------------------------------------------------------|--|------------------------------------------|--------------------------|------------------------------------------|--------------------------|
|                                                                                            |  | <b>Before loading</b>                    |                          | <b>After loading</b>                     |                          |
|                                                                                            |  | TiO <sub>2</sub> (anatase)-(101) surface | PtO <sub>x</sub> cluster | TiO <sub>2</sub> (anatase)-(101) surface | PtO <sub>x</sub> cluster |
| Badercharge (a.u.)                                                                         |  | 767.89                                   | 113.91                   | 767.88                                   | 113.99                   |

**Table S3.** Bader charges of TiO<sub>2</sub>(anatase)-(101) surface and PtO<sub>x</sub> cluster before and after loading.
